# Supplementary material
Source: publisher figshare collection journal article supplement (https://acs.figshare.com/ndownloader/files/4582276)
Supplement: Supplementary file 1 [file 4582276]

## Supporting Information

# **Physicochemical Properties of Micelles of Poly (styrene-*b*-[3-(methacryloylamino)propyl] trimethylammonium chloride-*b*-ethylene oxide) in Aqueous Solutions**

*Jingjing Liu,<sup>1</sup> Dian Liu,<sup>1</sup> Yuuichi Yokoyama,<sup>2</sup> Shin-ichi Yusa,<sup>2</sup> and Kenichi*

*Nakashima<sup>\*1</sup>*

<sup>1</sup>Department of Chemistry, Faculty of Science and Engineering, Saga University, 1

Honjo-machi, Saga 840-8502, Japan

<sup>2</sup> Department of Materials Science and Chemistry, University of Hyogo, 2167

Shosha, Himeji 671-2280, Japan

\*To whom any correspondence should be addressed. Fax: +81-952-28-8548. E-mail:

[nakashik@cc.saga-u.ac.jp](mailto:nakashik@cc.saga-u.ac.jp)

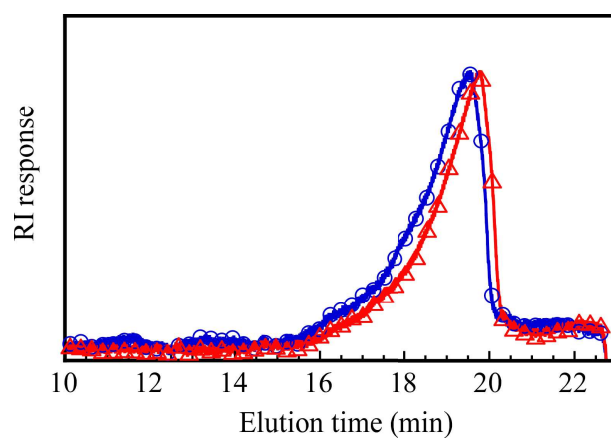

**Figure S1.** GPC elution curves of PEG-*b*-PMAPTAC ( $\triangle$ ) and PEG-*b*-PMAPTAC-*b*-PSt ( $\circ$ ) at 40 °C using DMSO containing 10 mM LiBr as the eluent.

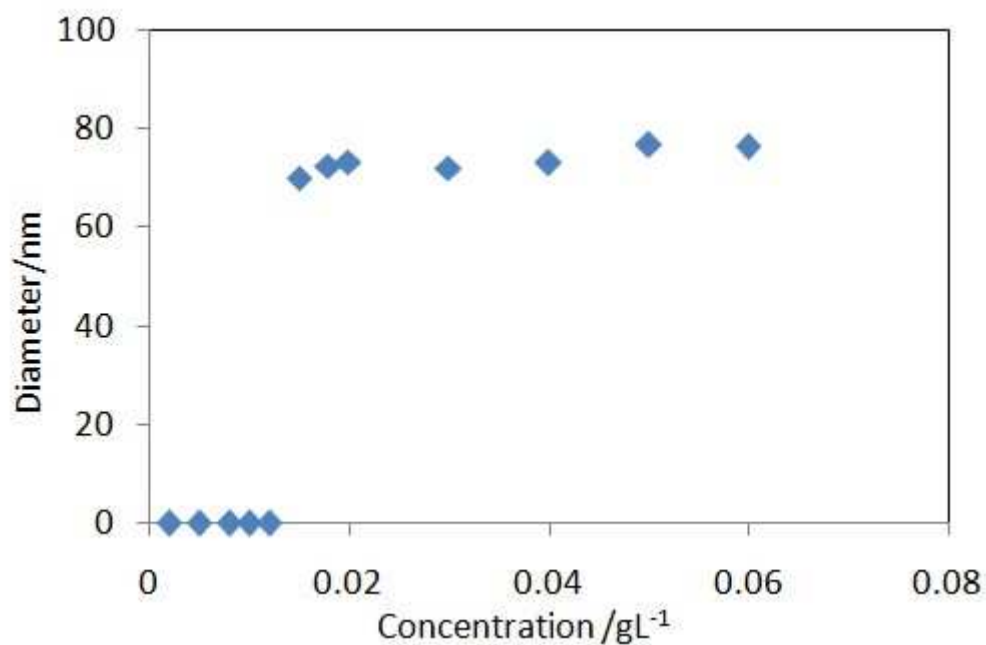

**Figure S2.** Hydrodynamic diameter ( $D_h$ ) of the micelles of PS-*b*-PMAPTAC-*b*-PEO as a function of the concentration of the polymer. The PDI values are 0.056~0.119 depending on the samples. Below the concentration of 0.015 gL<sup>-1</sup>, the scattered light intensity was so weak that we could not obtain reliable data. Thus, we plotted the data on the  $D_h = 0$  nm line in this figure for the samples with a concentration below 0.015 gL<sup>-1</sup>.

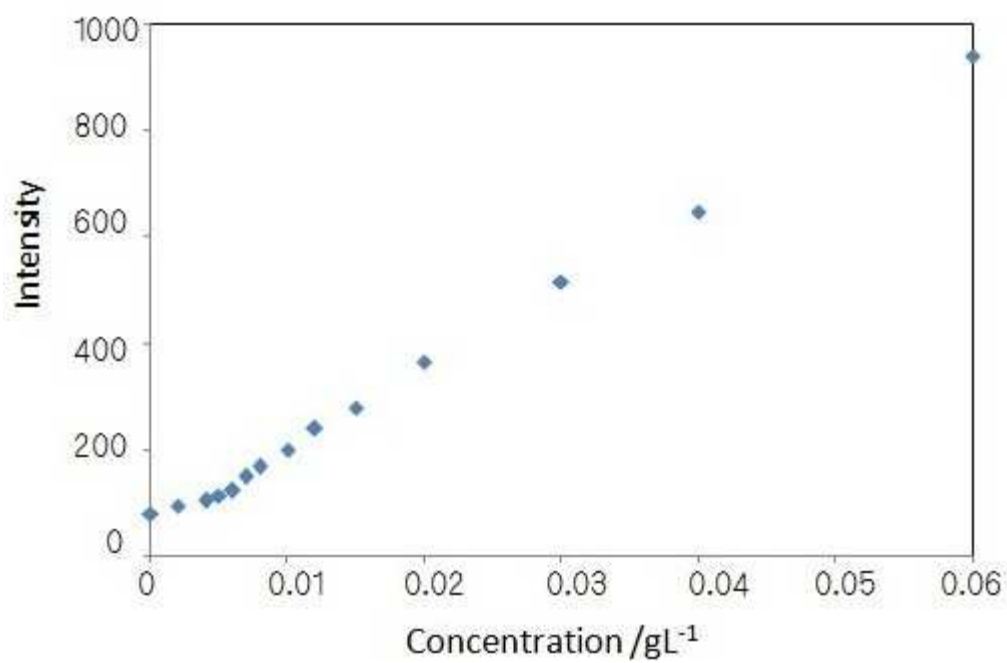

**Figure S3.** Light scattering intensity of micellar solutions of PS-*b*-PMAPTAC-*b*-PEO as a function of the concentration of the polymer.

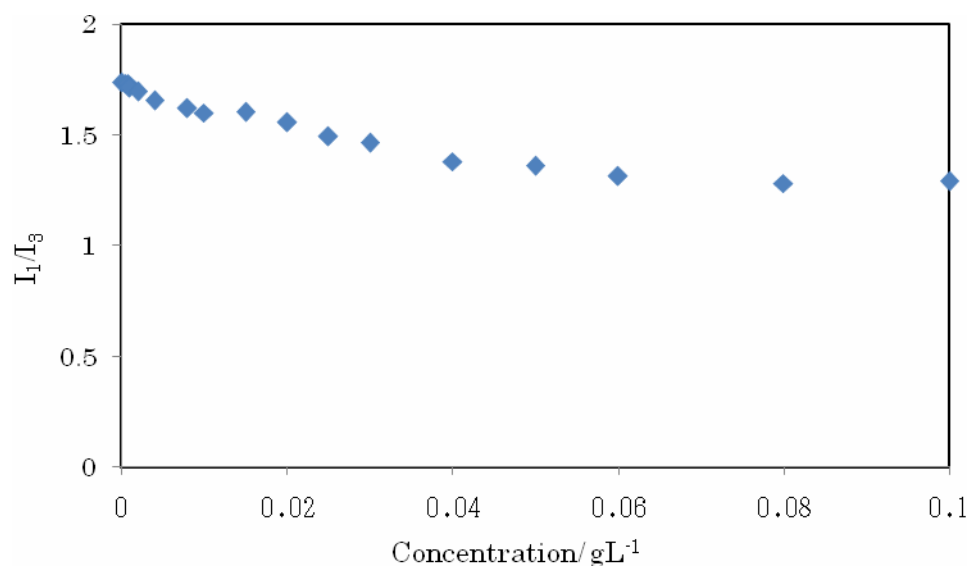

**Figure S4.** Fluorescence intensity of Pyrene in micellar solutions of PS-*b*-PMAPTAC-*b*-PEO as a function of the polymer concentration.
